# Supplementary material for: Snow algae communities in Antarctica: metabolic and taxonomic composition
Source: PubMed Central journal article supplement (PMC6492300; doi:10.1111/nph.15701), 2019-02-27
Supplement: NPH-222-1242-s001.pdf [file NPH-222-1242-s001.pdf]

## New *Phytologist* Supporting Information

### Article title: **Snow algae communities in Antarctica - metabolic and taxonomic composition**

Authors: Matthew P. Davey, Louisa Norman, Peter Sterk, Maria Huete-Ortega, Freddy Bunbury, Bradford Kin Wai Loh, Sian Stockton, Lloyd S. Peck, Peter Convey, Kevin K. Newsham, Alison G. Smith

Article acceptance date: 08 January 2019

The following Supporting Information is available for this article:

**Fig. S1** Supporting Information Figure S1: Alpha diversity rarefaction plots (to determine if the richness of the samples has been fully observed or sequenced) was calculated using the QIIME [diversity alpha-rarefaction] visualiser platform (Supporting QIIME script 3) for (a) 16S and (b) 18S sequence data from green and red communities.

(a)  
16S

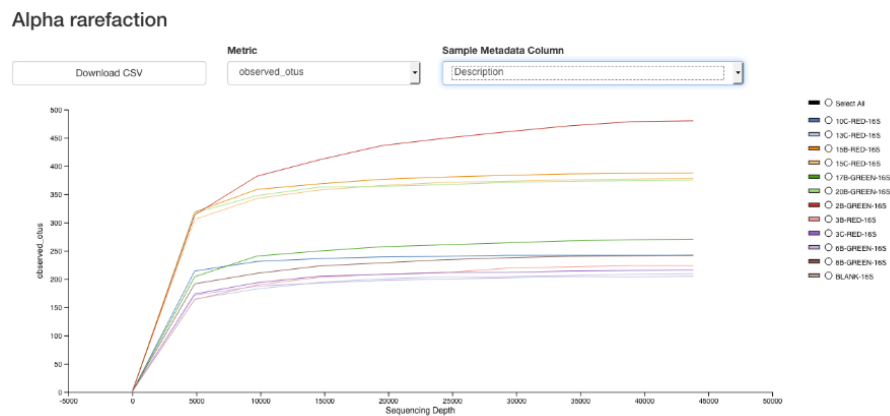

(b)  
ITS  
(18S)

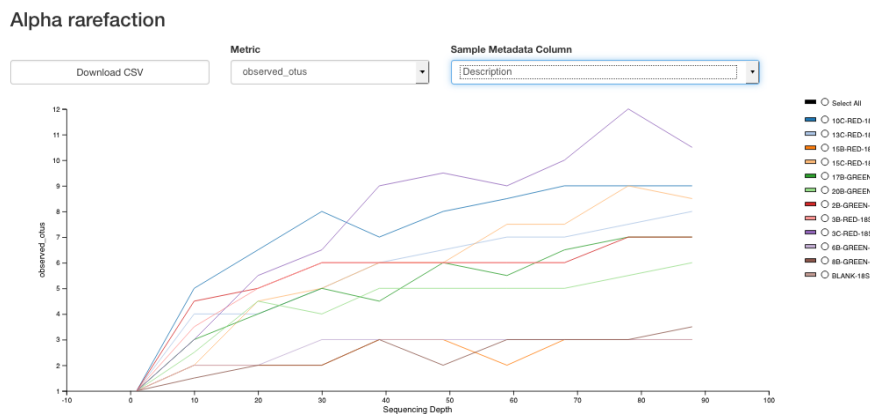

**Fig. S2** Supporting Information Figure S2: Snow algae community biomass as (a) cell number (cells ml<sup>-1</sup> snow melt) and (b) dry cell mass (mg l<sup>-1</sup> snow melt) from green and red snow algae communities collected from four locations adjacent to the Antarctic Peninsula (Rothera Point (RP), Anchorage Island (AN), Léonie Island (LE) and Lagoon Island (LG)) during January and February 2015 (austral summer). Data are mean  $\pm$  SD, Green, red sample sizes (n) for cell numbers are: RP 25,16; AN 15,30; LE 4,4; LG 12,14 and for dry weight are: RP 13,9; AN 9,18; LE 3,6; LG 9,8. Statistical differences (ANOVA) between green and red communities within a location are denoted by \* =  $P \leq 0.05$ , \*\*\* =  $P \leq 0.001$ .

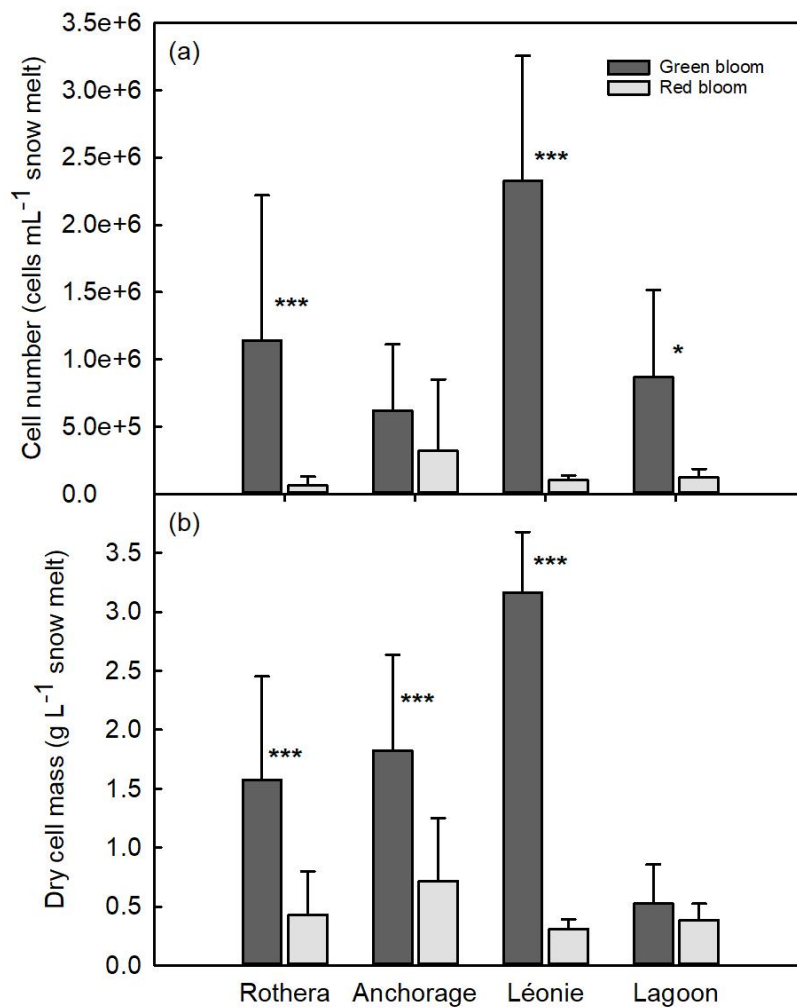

**Fig. S3** Supporting Information Figure S3: Representative UV-Vis absorption spectra of solvent ethanol extracts from green or red dominant snow algae communities taken within 24 h of collection from the field. Peaks associated with chlorophyll a (Chl a), chlorophyll b (Chl b) and astaxanthin ( $\lambda_{max} = 475$  nm) are highlighted. Representative green and red phase snow algal cells are also shown ( $\sim 10$   $\mu\text{m}$  cell diameter).

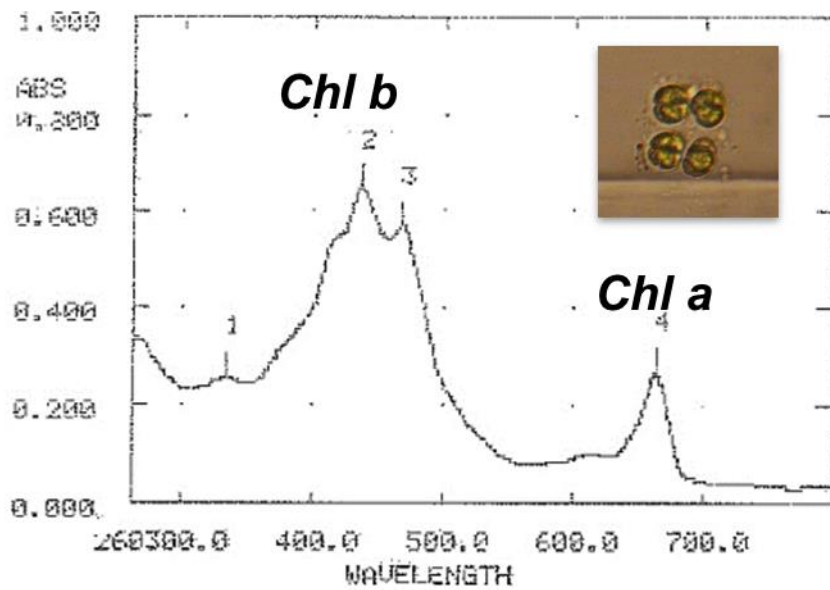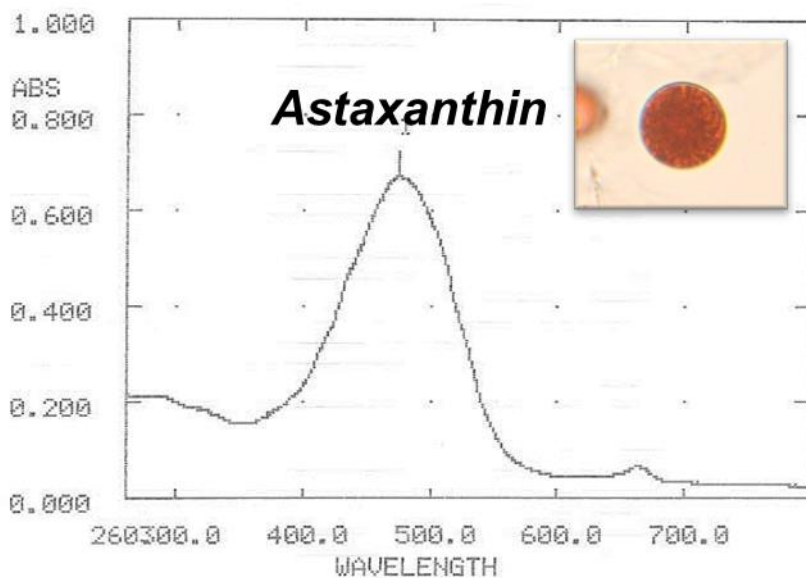

**UV Blue Green Red**

**Fig. S4** Supporting Information Figure S4: Pigment content of snow algae blooms. Total chlorophyll and carotenoids expressed as both mg g<sup>-1</sup> dry cell mass (DCM; panels A and C) and mg l<sup>-1</sup> snow melt (panels B and D) from green and red snow algae communities collected from four locations adjacent to the Antarctic Peninsula (Rothera Point (RP), Anchorage Island (AN), Léonie Island (LE) and Lagoon Island (LG)) during January and February 2015 (austral summer). Data are mean ± SD. Data are mean ± SD. Green, red sample sizes (n) = RP 4,3; AN 3,6; LE 1,2; LG 3,3. Statistical differences (ANOVA) between green and red communities within a location are denoted by \* = P ≤ 0.05, \*\* = P ≤ 0.01, \*\*\* = P ≤ 0.001. None of the carotenoid measurements were statistically different between bloom colours.

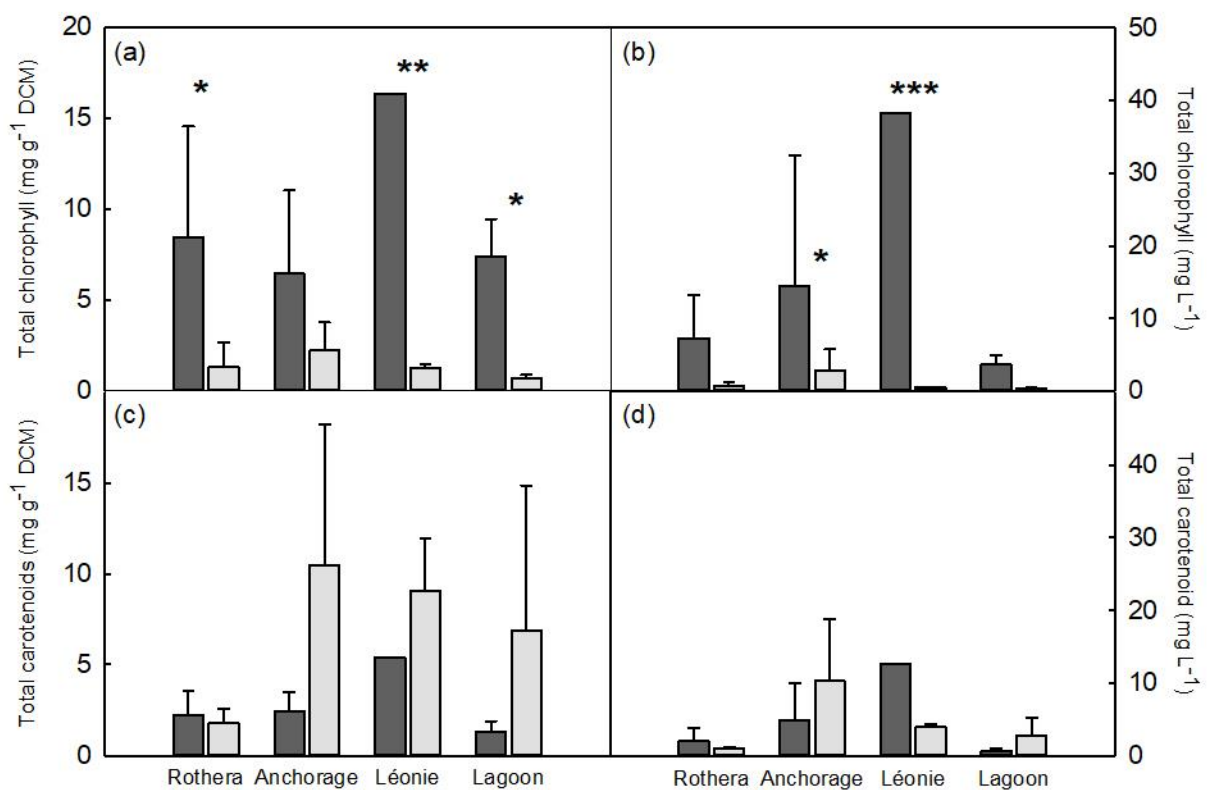

**Fig. S5** Supporting Information Figure S5: Screen shots of the alpha diversity boxplots to test for associations between discrete metadata categories (green and red algae communities) and 16S (a, b) and ITS (18S) (c, d) alpha diversity data using Faith's Phylogenetic Diversity (a qualitative measure of community richness that incorporates phylogenetic relationships between the features) and Pielou's Evenness (a measure of community evenness). Plots and H and P values (Kruskall-Wallis test) were measured using QIIME 2's diversity analyses [q2-diversity] plugin essentially as described in QIIME 2's moving pictures tutorial (version 2017.10; <https://docs.qiime2.org/2017.10/tutorials/moving-pictures/>).

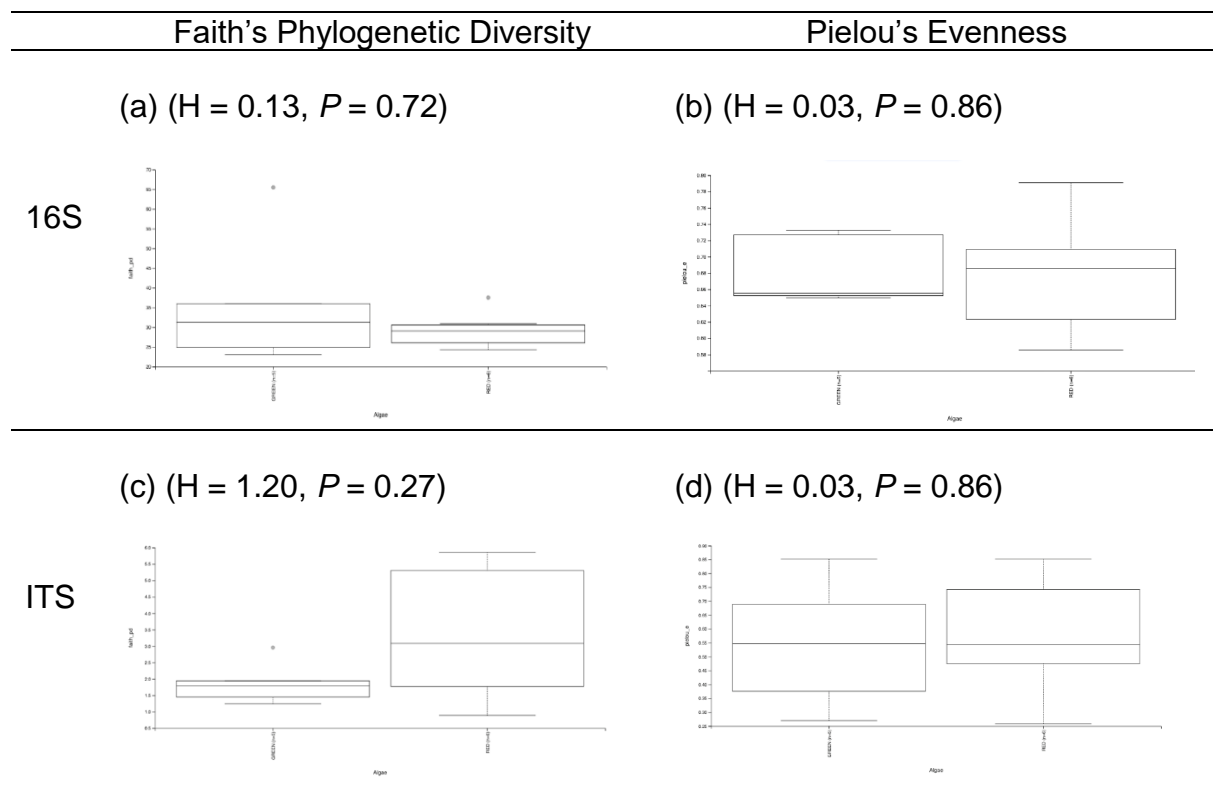

**Fig. S6** Supporting Information Figure S6: Screen shots of beta diversity boxplots using PERMANOVA to test for within and between green and red bloom community dissimilarity on 16S (a, b) and ITS (18S) (c, d) sequences. Plots and P values ( $P \geq 0.05$ , Kruskal-Wallis test) were measured using QIIME 2's diversity analyses [q2-diversity] plugin essentially as described in QIIME 2's moving pictures tutorial (version 2017.10; <https://docs.qiime2.org/2017.10/tutorials/moving-pictures/>).

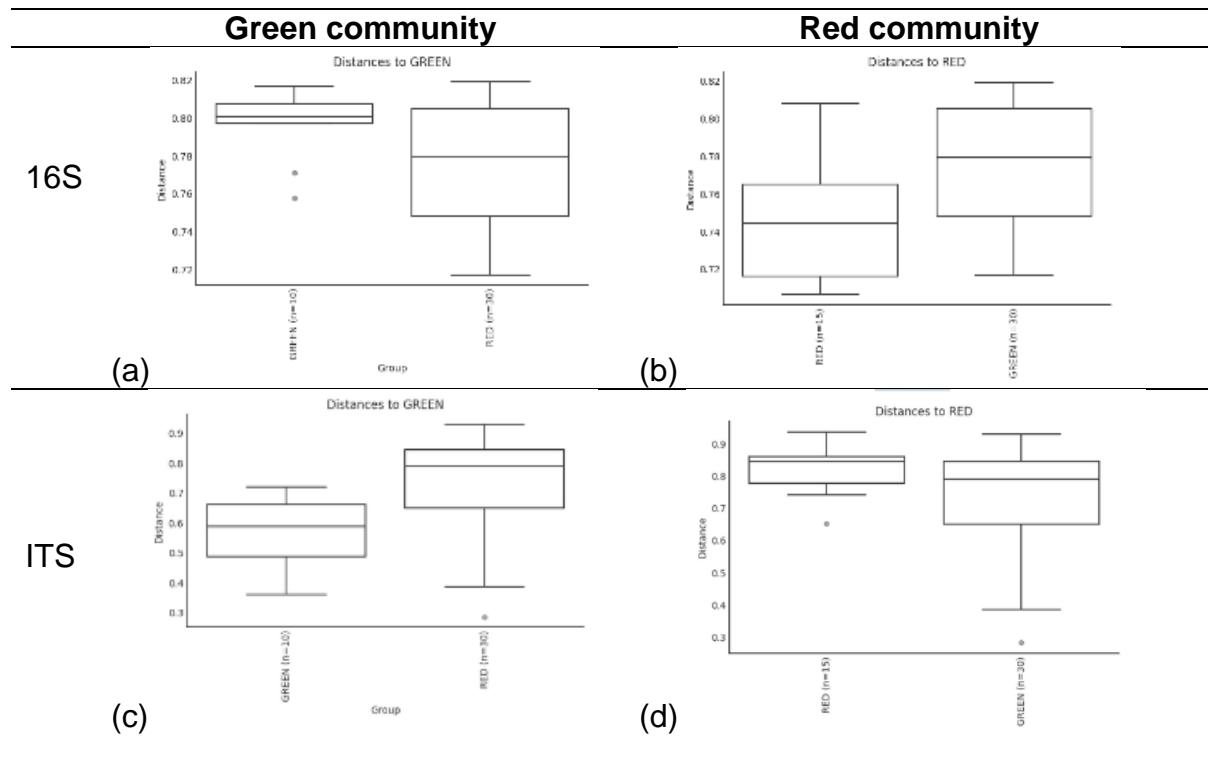

**Fig. S7** Supporting Information Figure S7: Metabarcoding reveals taxonomic similarities between green and red blooms. NMDS plots from raw taxonomically assigned 16S and ITS (18S) OTU sequence reads, and all OTUs detected (ignoring taxonomic assignments and 16S and ITS (18S) OTUs combined) of green and red snow algae communities collected from four locations adjacent to the Antarctic Peninsula (Rothera Point (RP), Anchorage Island (AN), Léonie Island (LE) and Lagoon Island (LA)) during January and February 2015 (austral summer). Polygons were added based on community colour for clarification. Plots were calculated using R script in vegan (Supporting data R script; <https://jonlefccheck.net/2012/10/24/nmds-tutorial-in-r/>) with stress levels 0.1-0.2, using the Bray-Curtis dissimilarity calculation (Paliy & Shankar 2016).

16S

18S

CLASS

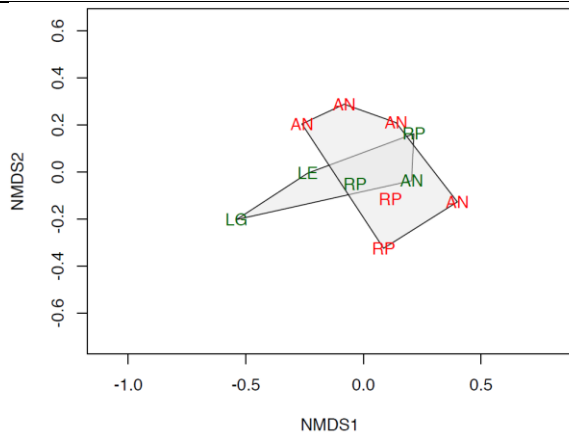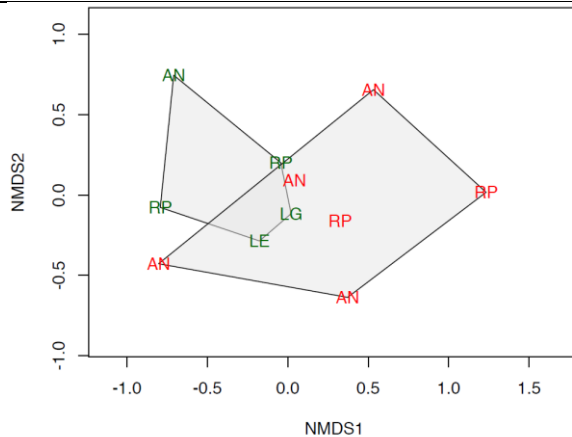

GENUS

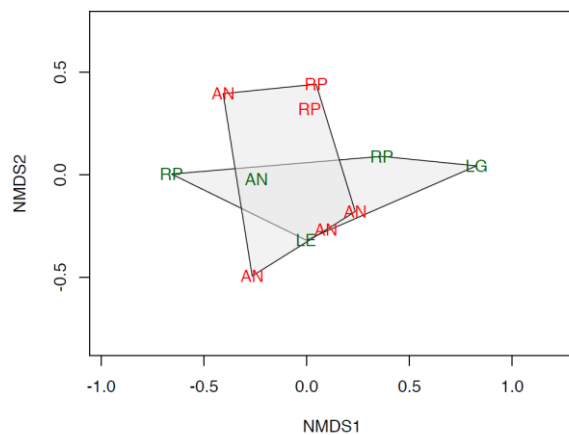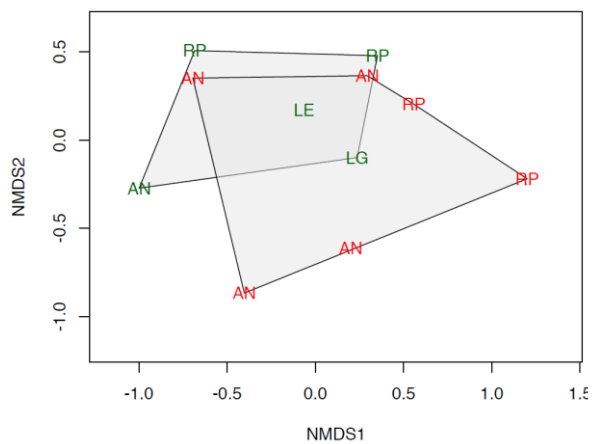

All

OTUs

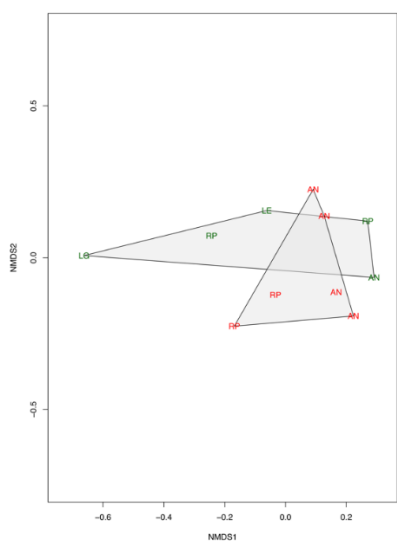



**Fig. S8** Supporting Information Figure S8: Composition of Chlorophyta OTUs in green and red snow algae blooms. Percent contribution of taxonomic assignments for 99% aligned OTUs for ITS1 (18S) sequences in green and red snow algae communities from Rothera Point, Anchorage Island, Léonie Island and Lagoon Island in Ryder Bay, Antarctica during January and February 2015 (austral summer). Percent contribution values are the mean relative abundance of the taxa in percentage of total sequences with more than 0.5% abundance and are classified at the Chlorophyta level or below. All values are mean of n = 5 (green community sites) and n = 6 (red community sites).

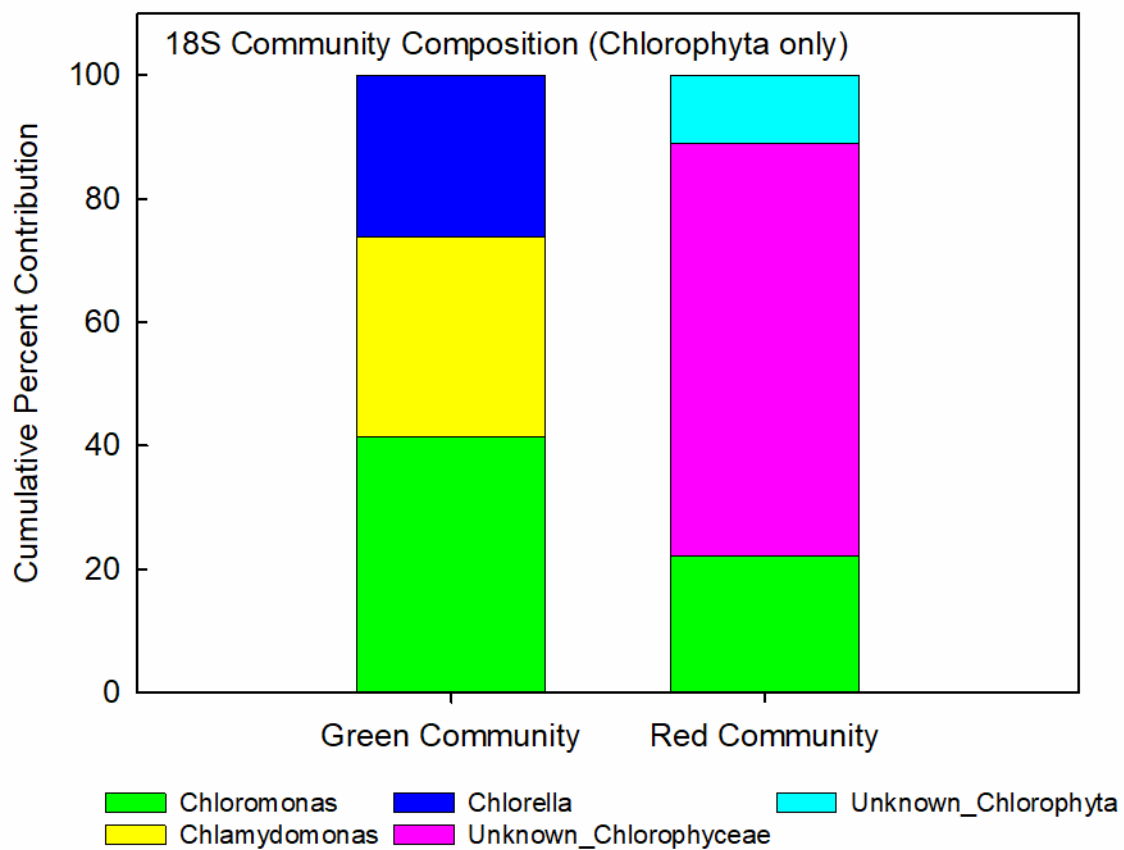

**Table S1** Supporting Information Table S1: Sampling island locations, average ( $\pm$  SD) light (PAR) received at snow surfaces and temperatures (snow surface and 5 cm depth) recorded during sampling (Jan–Feb 2015) in Ryder Bay, Antarctic Peninsula. Green and red blooms were sampled from all locations. Blooms lasted for at least 42 d, with bloom areas ranging from approximately 5 m<sup>2</sup> to >2500 m<sup>2</sup>. n.d. = no data.

| Location         | Latitude/Longitude        | Number of blooms studied | PAR $\mu\text{mol m}^{-2} \text{s}^{-1}$ | Temperature $^{\circ}\text{C}$ (surface) | Temperature $^{\circ}\text{C}$ (5cm depth) |
|------------------|---------------------------|--------------------------|------------------------------------------|------------------------------------------|--------------------------------------------|
| Rothera Point    | 67°34'05.9"S 68°06'50.7"W | 7                        | 684 $\pm$ 224                            | 1.4 $\pm$ 1.6                            | 0.06 $\pm$ 0.03                            |
| Anchorage Island | 67°36'15.9"S 68°12'36.9"W | 9                        | 1118 $\pm$ 576                           | 0.1 $\pm$ 0.06                           | 0.06 $\pm$ 0.03                            |
| Lagoon Island    | 67°35'36.7"S 68°14'18.6"W | 10                       | n.d.                                     | 0.08 $\pm$ 3.88                          | -3.83 $\pm$ 0.41                           |
| Léonie Island    | 67°35'52.3"S 68°19'32.0"W | 5                        | 1271 $\pm$ 256                           | -0.17 $\pm$ 3.18                         | -0.67 $\pm$ 3.21                           |

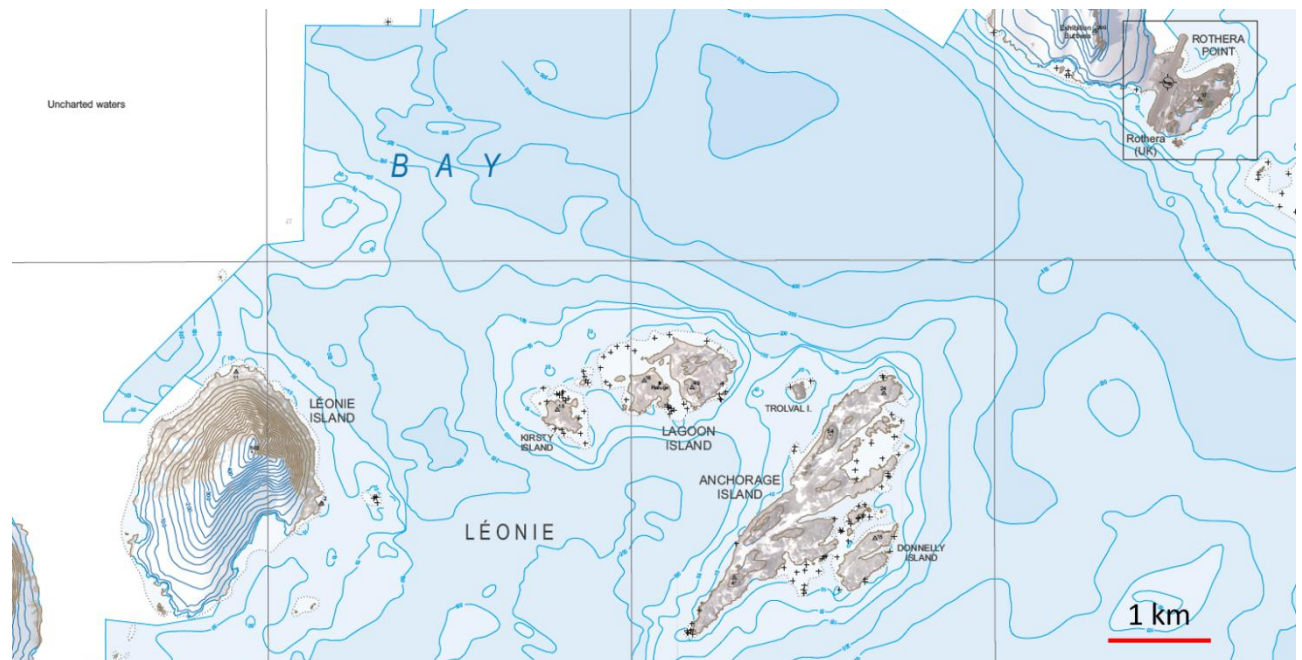

**Table S2** Supporting Information Table S2: FT-IR metabolic fingerprinting of snow algae communities. Absorption bands and wavenumber (cm<sup>-1</sup>) ranges of main functional groups and the associated wavenumbers that are positively associated with either green or red snow algae communities collected from four locations in maritime Antarctica in austral summer 2014/15.

| Functional groups                                                                         | Wavenumber range | Green community wavenumber range | Red community wavenumber range |
|-------------------------------------------------------------------------------------------|------------------|----------------------------------|--------------------------------|
| Lipid methyl/methylene bands<br>$\nu_{as}CH_3$ , $\nu_sCH_3$ , $\nu_{as}CH_2$ $\nu_sCH_2$ | 3050-2800        |                                  | 2856-2850                      |
| Lipid ester bands $\nu_s > C=O$                                                           | 1850-1700        |                                  | 1756-1732                      |
| Protein bands (amide I) $\nu_s C=O$                                                       | 1700-1600        | 1664-1589                        |                                |
| Protein bands (amide II) $\delta N-H$ , $\nu_s C-N$                                       | 1600-1500        | 1581-1489                        |                                |
| Polysaccharide bands $\nu_s CO-O-C$                                                       | 1200-930         |                                  | 1094-1002; 1144-1141           |

$\nu$  = stretching,  $\delta$  = bending,  $a$  = symmetric,  $as$  = asymmetric. Band classifications based on Benning *et al.*, 2004, Mayers *et al.*, 2013, Lutz *et al.*, 2015.

**Table S3** Supporting Information Table S3: Fatty acid composition of snow algae. Mean concentrations of total fatty acyl methyl esters (FAMES, expressed as mg g<sup>-1</sup> dry cell mass) of green and red snow algal communities collected from four locations in the maritime Antarctic (Rothera Point, Anchorage Island, Léonie Island and Lagoon Island) during austral summer (Jan–Feb) 2015. Values in bold are the most abundant FAMES detected.

| Fatty acid<br>unsaturation positions | Rothera Point      |                   | Anchorage Island   |                    | Léonie Island      |                    | Lagoon Island      |                     | All locations      |                    | General trend of difference<br>between all green and red<br>communities |
|--------------------------------------|--------------------|-------------------|--------------------|--------------------|--------------------|--------------------|--------------------|---------------------|--------------------|--------------------|-------------------------------------------------------------------------|
|                                      | Green<br>(SD, n=2) | Red<br>(SD, n=1)  | Green<br>(SD, n=2) | Red<br>(SD, n=5)   | Green<br>(SD, n=1) | Red<br>(SD, n=2)   | Green<br>(SD, n=3) | Red<br>(SD, n=2)    | Green<br>(SD, n=8) | Red<br>(SD, n=10)  |                                                                         |
| 4:0                                  | 1.3 (1.8)          | 0.7 (0.0)         | 0.2 (0.1)          | 0.9 (0.7)          | 0.5 (0.0)          | 0.3 (0.4)          | 1.1 (1.6)          | 1.3 (1.3)           | 0.9 (1.2)          | 0.8 (0.7)          | ↔                                                                       |
| <b>6:0</b>                           | <b>4.8 (5.6)</b>   | <b>6.7 (0.0)</b>  | <b>2.8 (2.5)</b>   | <b>9.4 (5.6)</b>   | <b>4.7 (0.0)</b>   | <b>7.3 (0.1)</b>   | <b>21.0 (19.9)</b> | <b>22.1 (0.1)</b>   | <b>10.4 (14.0)</b> | <b>11.3 (6.9)</b>  | ↑                                                                       |
| 6:1 (9)                              | 1.2 (1.5)          | 0.0 (0.0)         | 0.4 (0.2)          | 0.5 (0.1)          | 3.0 (0.0)          | 0.1 (0.1)          | 1.3 (1.2)          | 0.2 (0.0)           | 1.3 (1.2)          | 0.3 (0.2)          | ↓                                                                       |
| 6:1 (7)                              | 0.1 (0.1)          | 0.0 (0.0)         | 0.1 (0.1)          | 0.1 (0.1)          | 0.3 (0.0)          | 0.0 (0.1)          | 0.6 (0.7)          | 0.1 (0.0)           | 0.3 (0.5)          | 0.1 (0.1)          | ↓                                                                       |
| 6:2 (7,10)                           | 0.3 (0.3)          | 0.0 (0.0)         | 0.1 (0.1)          | 0.2 (0.1)          | 0.3 (0.0)          | 0.1 (0.1)          | 0.6 (0.8)          | 0.1 (0.1)           | 0.4 (0.5)          | 0.1 (0.1)          | ↓                                                                       |
| 6:3 (7,10,13)                        | 1.5 (1.8)          | 0.0 (0.0)         | 0.6 (0.4)          | 0.7 (0.4)          | 2.0 (0.0)          | 0.2 (0.2)          | 2.1 (1.9)          | 0.5 (0.4)           | 1.6 (1.4)          | 0.5 (0.4)          | ↓                                                                       |
| 6:4 (4,7,10,13)                      | 3.3 (3.7)          | 0.0 (0.0)         | 1.4 (1.2)          | 1.6 (0.6)          | 6.6 (0.0)          | 0.2 (0.3)          | 4.5 (4.3)          | 0.9 (1.0)           | 3.7 (3.2)          | 1.0 (0.8)          | ↓                                                                       |
| 8:0                                  | 0.8 (1.0)          | 3.6 (0.0)         | 0.6 (0.7)          | 2.0 (1.2)          | 0.6 (0.0)          | 1.4 (1.9)          | 6.7 (8.8)          | 5.2 (0.8)           | 3.0 (5.7)          | 2.7 (1.8)          | ↔                                                                       |
| <b>8:1 (11)</b>                      | <b>14.1 (16.2)</b> | <b>0.5 (0.0)</b>  | <b>7.4 (6.2)</b>   | <b>22.7 (17.0)</b> | <b>18.4 (0.0)</b>  | <b>8.1 (11.3)</b>  | <b>46.0 (29.0)</b> | <b>94.0 (44.3)</b>  | <b>24.9 (24.5)</b> | <b>31.8 (38.8)</b> | ↑                                                                       |
| 8:1 (10)                             | 0.1 (0.1)          | 0.1 (0.0)         | 0.1 (0.1)          | 0.2 (0.1)          | 0.1 (0.0)          | 0.1 (0.0)          | 0.6 (0.3)          | 1.0 (1.0)           | 0.3 (0.3)          | 0.3 (0.5)          | ↔                                                                       |
| 8:1 (9)                              | 0.6 (0.7)          | 0.8 (0.0)         | 0.3 (0.3)          | 0.8 (0.4)          | 0.6 (0.0)          | 0.6 (0.7)          | 3.5 (2.4)          | 11.4 (9.5)          | 1.9 (2.0)          | 2.9 (5.5)          | ↑                                                                       |
| 8:2 (9,12)                           | 2.0 (2.5)          | 0.0 (0.0)         | 0.6 (0.4)          | 0.9 (0.6)          | 2.3 (0.0)          | 0.2 (0.3)          | 2.9 (1.4)          | 1.1 (0.2)           | 2.0 (1.5)          | 0.7 (0.6)          | ↓                                                                       |
| 8:3 (6,9,12)                         | 0.1 (0.2)          | 0.0 (0.0)         | 0.0 (0.0)          | 0.1 (0.0)          | 0.1 (0.0)          | 0.0 (0.1)          | 0.3 (0.3)          | 0.0 (0.0)           | 0.2 (0.2)          | 0.0 (0.0)          | ↓                                                                       |
| 8:4 (6,9,12,15)                      | 2.4 (3.2)          | 0.0 (0.0)         | 0.5 (0.3)          | 0.6 (0.3)          | 2.0 (0.0)          | 0.1 (0.1)          | 1.2 (1.1)          | 0.4 (0.1)           | 1.4 (1.5)          | 0.4 (0.3)          | ↓                                                                       |
| 10:0                                 | 0.0 (0.1)          | 0.1 (0.0)         | 0.0 (0.0)          | 0.1 (0.0)          | 0.0 (0.0)          | 0.1 (0.1)          | 0.3 (0.2)          | 0.5 (0.0)           | 0.1 (0.2)          | 0.2 (0.2)          | ↔                                                                       |
| 12:6 (4,7,10,13,16,19)               | 0.5 (0.7)          | 0.0 (0.0)         | 0.0 (0.0)          | 0.0 (0.0)          | 0.0 (0.0)          | 0.0 (0.0)          | 0.0 (0.0)          | 0.0 (0.0)           | 0.1 (0.4)          | 0.0 (0.0)          | ↔                                                                       |
| <b>Sum FAMES</b>                     | <b>33.2 (39.6)</b> | <b>12.4 (0.0)</b> | <b>15.3 (12.7)</b> | <b>40.7 (24.0)</b> | <b>41.6 (0.0)</b>  | <b>19.0 (15.8)</b> | <b>92.8 (72.1)</b> | <b>138.9 (50.8)</b> | <b>52.1 (54.3)</b> | <b>53.1 (52.3)</b> | ↔                                                                       |

**Table S4** Supporting Information Table S4: Score contribution of putatively identified metabolites associated with either green (n = 11) or red (n = 14) algae communities. Score values are ranked in descending order of importance and are positive if they contribute towards PCA loading plots for the green snow algae communities and negative if they contribute towards the red snow algae communities.

| Green community            |                                                                                                     | Red community            |                                                                                                   |
|----------------------------|-----------------------------------------------------------------------------------------------------|--------------------------|---------------------------------------------------------------------------------------------------|
| Putative metabolite name   | Score contribution value (PC1-PC3) of metabolite (Descending order of importance for green samples) | Putative metabolite name | Score contribution value (PC1-PC3) of metabolite (Descending order of importance for red samples) |
| Asparagine                 | 2.49                                                                                                | Mannitol                 | -0.72                                                                                             |
| Succinic acid              | 2.42                                                                                                | Heptadecanoic acid       | -0.54                                                                                             |
| Valine                     | 2.18                                                                                                | Xylitol                  | -0.52                                                                                             |
| Aminoadipic acid           | 2.02                                                                                                | Dimethylheptanoic acid   | -0.49                                                                                             |
| Lysine                     | 1.90                                                                                                | Phenylethanolamine       | -0.49                                                                                             |
| Glutamic acid              | 1.84                                                                                                | Galactopyranoside        | -0.39                                                                                             |
| Inositol-2-phosphate       | 1.70                                                                                                | Glycerol                 | -0.33                                                                                             |
| Calystegine                | 1.63                                                                                                | Ribo-Hexitol             | -0.31                                                                                             |
| Lactic acid                | 1.60                                                                                                | Gulonic acid             | -0.30                                                                                             |
| Leucine                    | 1.56                                                                                                | Cystathionine            | -0.29                                                                                             |
| Alanine                    | 1.53                                                                                                | Isoleucine               | -0.27                                                                                             |
| Melibiose                  | 1.51                                                                                                | Octadecenoic acid        | -0.26                                                                                             |
| Galactosylglycerol         | 1.38                                                                                                | Fructose                 | -0.26                                                                                             |
| Glyceraldehyde-3-phosphate | 1.25                                                                                                | Sucrose                  | -0.26                                                                                             |
| Inosine                    | 1.25                                                                                                | Dimethylbenzoic acid     | -0.25                                                                                             |
| Malic acid                 | 0.80                                                                                                | Galacturonide            | -0.23                                                                                             |
| Threonine                  | 0.76                                                                                                | Glucofuranose            | -0.23                                                                                             |
| Putrescine                 | 0.71                                                                                                | Monolinoleoylglycerol    | -0.22                                                                                             |
| Trehalose                  | 0.33                                                                                                | Carbamic acid            | -0.22                                                                                             |
| Cyclooctanecarboxylic acid | 0.25                                                                                                | Galactonolactone         | -0.22                                                                                             |
| Cysteine                   | 0.25                                                                                                | Glucosamine              | -0.22                                                                                             |
| Erythro-Pentitol           | 0.25                                                                                                | Hexadecanenitrile        | -0.21                                                                                             |
| Glucuronic acid            | 0.25                                                                                                | Lactose                  | -0.21                                                                                             |
| Hydroxybutyric acid        | 0.25                                                                                                | Erythritol               | -0.21                                                                                             |
| Nitrobarbiturate           | 0.25                                                                                                | Glucose                  | -0.21                                                                                             |
| Tyrosine                   | 0.25                                                                                                | Cellobiose               | -0.19                                                                                             |
| Uracil                     | 0.25                                                                                                | Galactopyranose          | -0.19                                                                                             |
| Uridine                    | 0.25                                                                                                | Sorbose                  | -0.19                                                                                             |
| Mannopyranoside            | 0.25                                                                                                | Octadecatrienoic acid    | -0.17                                                                                             |
| Hypoxanthine               | 0.25                                                                                                | Erythrofuranose          | -0.16                                                                                             |

|                       |      |                           |       |
|-----------------------|------|---------------------------|-------|
| Inositol              | 0.20 | Xylose                    | -0.16 |
| Hexitol               | 0.18 | Tetradecanoic acid        | -0.16 |
| Galactose-6-phosphate | 0.18 | Allantoin                 | -0.16 |
| Phosphoric acid       | 0.17 | Guanine                   | -0.15 |
| Fumaric acid          | 0.17 | Oleanitrile               | -0.15 |
| Indole                | 0.16 | Tyramine                  | -0.14 |
| Ketogluconic acid     | 0.15 | Aminobutyric acid         | -0.14 |
| Psicofuranose         | 0.14 | Gulono-1,4-lactone        | -0.13 |
| Butenedioic acid      | 0.13 | Mercaptosuccinic acid     | -0.13 |
| Carbamate             | 0.13 | Glucopyranosiduronic acid | -0.13 |
| Mannose-6-phosphate   | 0.13 | Mannopyranosyl            | -0.13 |
| Ribose                | 0.13 | Dehydroascorbic acid      | -0.11 |
| Adenosine             | 0.13 | Octanoic acid             | -0.11 |
| Hexanoic acid         | 0.11 | Maltose                   | -0.09 |
| Tagatofuranose        | 0.10 | Fructofuranose            | -0.08 |
| Glyceric acid         | 0.10 | Propanoic acid            | -0.08 |
| Gluconic acid         | 0.09 | Ascorbic acid             | -0.08 |
| Eicosatetraynoic acid | 0.09 | Dodecanoic acid           | -0.06 |
| Pyroglutamic acid     | 0.09 | Octanoate                 | -0.06 |
| Decanoic acid         | 0.09 | Fucitol                   | -0.05 |
| Pentadecane           | 0.08 | Hexadecanoic acid         | -0.05 |
| Butanoic acid         | 0.06 | Octadecanoic acid         | -0.05 |
| Tricosadiynoic acid   | 0.06 | Acetylglutamic acid       | -0.03 |
| Sorbitol              | 0.06 | Proline                   | -0.02 |
| Serine                | 0.05 | Tagatose                  | -0.02 |
| Docosahexaenoic acid  | 0.05 | Urea                      | -0.02 |
| Threonic acid         | 0.04 | Uric acid                 | -0.02 |
| Glucopyranoside       | 0.03 | Erythrose                 | -0.02 |
| Galactose             | 0.03 | Threose                   | -0.01 |
| Mannose               | 0.02 | Methionine                | -0.01 |
| Arabinopyranose       | 0.02 | Pentitol                  | -0.01 |

---

**Table S5** Supporting Information Table S5. Metabolite pathways of the putatively identified metabolites associated with either green or red snow algae communities. Pathways are ranked in descending order of importance based on the total number of metabolites within a pathway and the number of identified metabolites within the pathway that were identified as contributing towards separating green and red samples within PCA score scatter plots. In silico analysis was performed with MetaboAnalyst v4 Pathway Analysis Tool using the *Arabidopsis thaliana* metabolic pathway library. Hits of 1 are omitted.

| Green community                                                                 |                                        |                                                                |  | Red Community                                                                 |                                        |                                                                |
|---------------------------------------------------------------------------------|----------------------------------------|----------------------------------------------------------------|--|-------------------------------------------------------------------------------|----------------------------------------|----------------------------------------------------------------|
| Pathway name (ranked on descending order of metabolite hits from green samples) | Total number of metabolites in pathway | Number of identified metabolite hits matching those in pathway |  | Pathway name (ranked on descending order of metabolite hits from red samples) | Total number of metabolites in pathway | Number of identified metabolite hits matching those in pathway |
| Aminoacyl-tRNA biosynthesis                                                     | 67                                     | 16                                                             |  | Galactose metabolism                                                          | 26                                     | 4                                                              |
| Arginine and proline metabolism                                                 | 38                                     | 9                                                              |  | Starch and sucrose metabolism                                                 | 30                                     | 4                                                              |
| Alanine, aspartate and glutamate metabolism                                     | 22                                     | 7                                                              |  | Fatty acid biosynthesis                                                       | 49                                     | 5                                                              |
| Nitrogen metabolism                                                             | 15                                     | 4                                                              |  | Ascorbate and aldarate metabolism                                             | 15                                     | 2                                                              |
| Glutathione metabolism                                                          | 26                                     | 5                                                              |  | Arginine and proline metabolism                                               | 38                                     | 3                                                              |
| Galactose metabolism                                                            | 26                                     | 5                                                              |  | Cysteine and methionine metabolism                                            | 34                                     | 2                                                              |
| Cyanoamino acid metabolism                                                      | 11                                     | 3                                                              |  | Purine metabolism                                                             | 61                                     | 3                                                              |
| Fructose and mannose metabolism                                                 | 16                                     | 3                                                              |  | Aminoacyl-tRNA biosynthesis                                                   | 67                                     | 3                                                              |
| Glycine, serine and threonine metabolism                                        | 30                                     | 4                                                              |  | Amino sugar and nucleotide sugar metabolism                                   | 41                                     | 2                                                              |
| Tyrosine metabolism                                                             | 18                                     | 3                                                              |  | Biosynthesis of unsaturated fatty acids                                       | 42                                     | 2                                                              |
| Purine metabolism                                                               | 61                                     | 6                                                              |  | Glucosinolate biosynthesis                                                    | 54                                     | 2                                                              |
| Citrate cycle (TCA cycle)                                                       | 20                                     | 3                                                              |  |                                                                               |                                        |                                                                |
| Cysteine and methionine metabolism                                              | 34                                     | 4                                                              |  |                                                                               |                                        |                                                                |
| Lysine biosynthesis                                                             | 10                                     | 2                                                              |  |                                                                               |                                        |                                                                |
| Methane metabolism                                                              | 11                                     | 2                                                              |  |                                                                               |                                        |                                                                |
| Sulfur metabolism                                                               | 12                                     | 2                                                              |  |                                                                               |                                        |                                                                |
| Valine, leucine and isoleucine biosynthesis                                     | 26                                     | 3                                                              |  |                                                                               |                                        |                                                                |
| Ascorbate and aldarate metabolism                                               | 15                                     | 2                                                              |  |                                                                               |                                        |                                                                |
| Glyoxylate and dicarboxylate metabolism                                         | 17                                     | 2                                                              |  |                                                                               |                                        |                                                                |
| Pentose phosphate pathway                                                       | 18                                     | 2                                                              |  |                                                                               |                                        |                                                                |
| Butanoate metabolism                                                            | 18                                     | 2                                                              |  |                                                                               |                                        |                                                                |
| Phenylalanine, tyrosine and tryptophan biosynthesis                             | 21                                     | 2                                                              |  |                                                                               |                                        |                                                                |
| Carbon fixation in photosynthetic organisms                                     | 21                                     | 2                                                              |  |                                                                               |                                        |                                                                |
| Pyrimidine metabolism                                                           | 38                                     | 3                                                              |  |                                                                               |                                        |                                                                |
| Inositol phosphate metabolism                                                   | 24                                     | 2                                                              |  |                                                                               |                                        |                                                                |

|                                             |    |   |
|---------------------------------------------|----|---|
| Glucosinolate biosynthesis                  | 54 | 3 |
| Valine, leucine and isoleucine degradation  | 34 | 2 |
| Amino sugar and nucleotide sugar metabolism | 41 | 2 |

---



**Table S6** Supporting Information Table S6. Percentage contributions and number of taxonomic assignments for Level 2 (Kingdom/Phylum) 99% aligned OTUs for 16S rRNA gene and ITS1 (18S) sequences in green and red snow algae communities from Ryder Bay, Antarctica. Percentage contribution values are the mean relative abundance of the taxon in percentage of total sequences with more than 0.5% abundance. Low abundance OTU values are the sum of the percentages for taxa identified below 0.5% contribution. All values are means of n = 5 (green communities) and n = 6 (red communities) +/- standard deviation and are ranked in descending order of green community values. SAR = “stramenopiles, alveolata, rhizaria”. None of the values were statistically different between communities at this taxonomy level.

| 16S rRNA gene Level 2 (Phylum) taxonomy assignment |                      |             |                     |               | ITS1 (18S) Level 2 (Phylum) taxonomy assignment |                      |             |                     |            |
|----------------------------------------------------|----------------------|-------------|---------------------|---------------|-------------------------------------------------|----------------------|-------------|---------------------|------------|
|                                                    | Percent contribution |             | Number of OTU reads |               |                                                 | Percent contribution |             | Number of OTU reads |            |
|                                                    | Green                | Red         | Green               | Red           |                                                 | Green                | Red         | Green               | Red        |
| Bacteroidetes                                      | 62.1 (17.2)          | 56.5 (11.6) | 52566 (30515)       | 41763 (21320) | SAR                                             | 49.8 (37.1)          | 37.2 (43.0) | 444 (477)           | 825 (1732) |
| Proteobacteria                                     | 22.0 (13.1)          | 27.1 (12.0) | 17645 (11782)       | 18226 (7842)  | Opisthokonta                                    | 39.9 (39.0)          | 43.6 (41.6) | 362 (460)           | 85 (97)    |
| Unknown Bacteria                                   | 6.1 (4.3)            | 9.6 (4.9)   | 4429 (2806)         | 6545 (3250)   | Excavata                                        | 5.6 (12.5)           | 0.2 (0.4)   | 10 (21.9)           | 4 (6)      |
| Cyanobacteria                                      | 4.2 (4.8)            | 3.0 (2.1)   | 2855 (3192)         | 1957 (1237)   | Archaeplastida                                  | 4.0 (4.7)            | 16.4 (22.3) | 13 (10)             | 25 (29)    |
| Archaeplastida                                     | 2.1 (1.6)            | 0.8 (0.4)   | 1918 (2286)         | 539 (291)     | Unclassified                                    | 0.7 (1.0)            | 2.6 (3.8)   | 7 (13)              | 56 (134)   |
| Actinobacteria                                     | 1.9 (0.9)            | 1.5 (0.6)   | 1700 (1528)         | 1045 (507)    |                                                 |                      |             |                     |            |
| Unclassified                                       | 0.6 (0.3)            | 0.5 (0.2)   | 522 (489)           | 358 (158)     |                                                 |                      |             |                     |            |
| Low abundant OTUs                                  | 0.9 (0.1)            | 1.1 (0.1)   | 713 (61)            | 755 (60)      |                                                 |                      |             |                     |            |
| Shannon's Diversity Index                          |                      |             | 1.15                | 1.18          | Shannon's Diversity Index                       |                      |             | 0.86                | 0.64       |

**Table S7** Supporting Information Table S7. Percentage contributions and number of taxonomic assignments for Level 3 (Order, Class) 99% aligned OTUs for 16S rRNA gene and ITS1 (18S) sequences in green and red snow algae communities from Ryder Bay, Antarctica. Percentage contribution values are the mean relative abundances of the taxa in percentage of total sequences with more than 0.5% abundance. Low abundance OTU values are the sum of the percentages for taxa identified below 0.5% contribution. All values are means of n = 5 (green communities) and n = 6 (red communities) +/- standard deviation and are ranked in descending order of green community values. \* = P < 0.05 (between green and red communities).

|                           | 16S rRNA gene Level 3-4 (eg. Class) taxonomy assignment |              |                     |               | 18S ITS1 Level 2 (eg. Class) taxonomy assignment |             |                     |           |            |
|---------------------------|---------------------------------------------------------|--------------|---------------------|---------------|--------------------------------------------------|-------------|---------------------|-----------|------------|
|                           | Percent contribution                                    |              | Number of OTU reads |               | Percent contribution                             |             | Number of OTU reads |           |            |
|                           | Green                                                   | Red          | Green               | Red           | Green                                            | Red         | Green               | Red       | Red        |
| Flavobacteria             | 33.1 (21.5)                                             | 22.5 (8.6)   | 29746 (25541)       | 15185 (5467)  | Unknown Alveolata (SAR)                          | 49.7 (36.9) | 36.8 (42.4)         | 443 (477) | 804 (1682) |
| Sphingobacteria           | 21.3 (5.4)                                              | 11.5 (8.9) * | 16805 (6433)        | 8230 (6282) * | Tremellaceae (Fungi)                             | 26.5 (38.6) | 8.4 (11.9)          | 145 (218) | 13 (20)    |
| Betaproteobacteria        | 17.2 (11.1)                                             | 17.8 (10.7)  | 14094 (10725)       | 12092 (7482)  | Rhizophydiales (Fungi)                           | 12.8 (28.0) | 12.7 (31.2)         | 211 (463) | 15 (36)    |
| Cytophagia                | 7.5 (5.1)                                               | 22.4 (21.2)  | 5885 (3696)         | 18287 (19559) | Tetramitia (Excavata)                            | 5.6 (12.5)  | 0.0 (0.0)           | 10 (22)   | 0 (0)      |
| Unknown Bacteria          | 6.1 (4.3)                                               | 9.6 (4.9)    | 4429 (2806)         | 6545 (3250)   | Chlorophyceae                                    | 3.4 (5.0)   | 15.5 (22.7)         | 10 (12)   | 22 (26)    |
| Cyanobacteria Chloroplast | 4.1 (4.9)                                               | 2.9 (2.0)    | 2762 (3218)         | 1846 (1189)   | Unclassified                                     | 0.7 (1.0)   | 2.6 (3.8)           | 7 (13)    | 56 (134)   |
| Gammaproteobacteria       | 3.7 (2.2)                                               | 8.4 (13.0)   | 2682 (1396)         | 5588 (9079)   | Trebouxiophyceae (Chlorophyta)                   | 0.6 (1.3)   | 0.0 (0.0)           | 3 (8)     | 0 (0)      |
| Chloroplastida            | 2.1 (1.6)                                               | 0.8 (0.4)    | 1918 (2286)         | 539 (291)     | Dothideomycetes (Fungi)                          | 0.1 (0.3)   | 7.4 (17.0)          | 1 (2)     | 20 (48)    |
| Actinobacteria            | 1.9 (0.9)                                               | 1.5 (0.6)    | 1674 (1542)         | 1033 (496)    | Unknown Fungi                                    | 0.0 (0.0)   | 9.4 (22.8)          | 0 (0)     | 29 (63)    |
| Alphaproteobacteria       | 0.8 (0.4)                                               | 0.8 (0.5)    | 608 (323)           | 512 (358)     | Dikarya (Fungi)                                  | 0.0 (0.0)   | 5.7 (13.6)          | 0 (0)     | 9 (14)     |
| Unclassified              | 0.6 (0.3)                                               | 0.5 (0.2)    | 522 (489)           | 358 (158)     | Unknown Chlorophyta                              | 0.0 (0.0)   | 0.9 (2.1)           | 0 (0)     | 3 (4)      |
| Low abundance OTUs        | 1.6 (0.1)                                               | 1.4 (0.1)    | 1222 (46)           | 975 (43)      | Low abundance OTUs                               | 0.6 (0.2)   | 0.6 (0.1)           | 6 (2)     | 24 (6)     |
| Shannon's Diversity Index |                                                         |              | 1.9                 | 2.0           | Shannon's Diversity Index                        |             |                     | 1.20      | 0.89       |

**Table S8** Supporting Information Table S8. Percentage contributions and numbers of taxonomic assignments for Level 6 (Family, Genus) 99% aligned OTUs for 16S rRNA gene and ITS1 (18S) sequences in green and red snow algae communities from Ryder Bay, Antarctica. Percentage contribution values are the mean relative abundance of the taxa in percentage of total sequences with more than 0.5% abundance. Low abundance OTU values are the sum of the percentages for taxa identified below 0.5% contribution. All values are means of n = 5 (green community sites) and n = 6 (red community sites) +/- standard deviation and are ranked in descending order of green community values. \* = P < 0.05; \*\* = P < 0.01 (between green and red communities).

|                             | 16S rRNA gene Level 6 (e.g. genus) taxonomy assignment |               |                     |               | 18S ITS1 Level 6 (e.g. genus) taxonomy assignment |                      |             |                     |            |
|-----------------------------|--------------------------------------------------------|---------------|---------------------|---------------|---------------------------------------------------|----------------------|-------------|---------------------|------------|
|                             | Percent contribution                                   |               | Number of OTU reads |               |                                                   | Percent contribution |             | Number of OTU reads |            |
|                             | Green                                                  | Red           | Green               | Red           |                                                   | Green                | Red         | Green               | Red        |
| <i>Flavobacterium</i>       | 28.4 (23.6)                                            | 10.2 (8.5)    | 26739 (27045)       | 6139 (3681)   | Unknown_Alveolata (SAR)                           | 49.7 (36.9)          | 36.8 (42.4) | 443 (477)           | 804 (1682) |
| <i>Pedobacter</i>           | 14.9 (8.2)                                             | 9.2 (7.2)     | 12338 (7181)        | 6667 (5286)   | Unknown <i>Cryptococcus</i> (Fungi)               | 26.5 (38.6)          | 8.4 (11.9)  | 145 (218)           | 13 (20)    |
| <i>Hymenobacter</i>         | 6.4 (5.9)                                              | 22.2 (21.3)   | 4783 (4158)         | 18126 (19626) | Unknown Rhizophydiales (Fungi)                    | 12.8 (28.0)          | 12.7 (31.2) | 211 (463)           | 15 (36)    |
| Unknown Bacteria            | 6.1 (4.3)                                              | 9.6 (4.9)     | 4429 (2806)         | 6545 (3250)   | <i>Tetramitis</i> (Excavata)                      | 5.6 (12.5)           | 0.0 (0.0)   | 10 (22)             | 0 (0)      |
| <i>Massilia</i>             | 5.8 (9.5)                                              | 1.6 (2.8)     | 3278 (4996)         | 904 (1217)    | Uncultured <i>Chloromonas</i> (Chlorophyta)       | 2.5 (5.0)            | 6.0 (11.1)  | 5 (8)               | 5 (6)      |
| Unknown Sphingobacteriaceae | 5.5 (6.7)                                              | 1.6 (1.5)     | 3758 (3923)         | 1127 (1043)   | <i>Chlamydomonas</i> (Chlorophyta)                | 0.9 (2.1)            | 0.0 (0.0)   | 4 (9)               | 0 (0)      |
| <i>Polaromonas</i>          | 5.1 (3.3)                                              | 6.2 (3.8)     | 4801 (5356)         | 4526 (3514)   | Unclassified                                      | 0.7 (1.0)            | 2.6 (3.8)   | 7 (13)              | 56 (134)   |
| Unknown Comamonadaceae      | 5.0 (3.2)                                              | 9.1 (5.7)     | 4966 (5319)         | 6120 (3863)   | <i>Chlorella</i> (Chlorophyta)                    | 0.6 (1.3)            | 0.0 (0.0)   | 3 (8)               | 0 (0)      |
| Unknown Cyanobacteria       | 4.1 (4.9)                                              | 2.9 (2.0)     | 2761 (3218)         | 1846 (1189)   | Unknown Fungi                                     | 0.0 (0.0)            | 9.4 (22.8)  | 0 (0)               | 29 (63)    |
| <i>Chryseobacterium</i>     | 4.0 (4.1)                                              | 11.4 (2.8) ** | 2576 (5290)         | 8377 (4666) * | Unknown Chlorophyceae                             | 0.0 (0.0)            | 9.1 (21.6)  | 0 (0)               | 16 (26)    |
| Unknown Chlorophyceae       | 1.7 (1.5)                                              | 0.4 (0.2)     | 1606 (1989)         | 311 (190)     | Unknown Pleosporales (Fungi)                      | 0.0 (0.0)            | 7.0 (17.1)  | 0 (0)               | 20 (48)    |

|                           |           |            |             |             |                               |           |            |       |        |
|---------------------------|-----------|------------|-------------|-------------|-------------------------------|-----------|------------|-------|--------|
| <i>Rhodanobacter</i>      | 1.7 (1.7) | 6.8 (13.3) | 1068 (1083) | 4522 (9259) | Unknown Basidiomycota (Fungi) | 0.0 (0.0) | 5.7 (13.6) | 0 (0) | 9 (14) |
| Unknown Microbacteriaceae | 1.5 (0.9) | 1.0 (0.4)  | 1390 (1458) | 757 (352)   | Unknown Chlorophyta           | 0.0 (0.0) | 0.9 (2.1)  | 0 (0) | 3 (4)  |
| Unknown Oxalobacteraceae  | 0.8 (0.5) | 0.7 (0.9)  | 498 (151)   | 392 (419)   | Low abundance OTUs            | 0.7 (0.1) | 1.5 (0.2)  | 7 (2) | 25 (6) |
| <i>Arcicella</i>          | 0.7 (1.2) | 0.0 (0.0)  | 692 (1240)  | 8 (18)      |                               |           |            |       |        |
| <i>Pseudomonas</i>        | 0.6 (0.7) | 0.3 (0.5)  | 448 (426)   | 128 (192)   |                               |           |            |       |        |
| Unclassified              | 0.6 (0.3) | 0.5 (0.2)  | 522 (489)   | 358 (158)   |                               |           |            |       |        |
| <i>Marinobacter</i>       | 0.3 (0.4) | 1.0 (1.8)  | 260 (307)   | 675 (1081)  |                               |           |            |       |        |
| Low abundance OTUs        | 6.7 (0.1) | 5.3 (0.1)  | 5433 (48)   | 3662 (37)   |                               |           |            |       |        |
| Shannon's Diversity Index |           |            | 2.61        | 2.58        | Shannon's Diversity Index     |           |            | 1.21  | 0.91   |

**Table S9** Supporting Information Table S9: Targeted genomic identification of snow algae. Top three sequence alignments of forward BLAST searches on 18S rRNA gene sequences (from “SA Forward” primer, GenBank accession numbers MK330877 and MK330879) from axenic green snow algae collected from Lagoon Island, Antarctic Peninsula during austral summer 2015. Sequences were aligned against datasets containing either all species, *Chloromonas nivalis* only or *Chlamydomonas nivalis* only using BLAST (National Center for Biotechnology Information, NCBI). All alignments have an E value of 0.0 with a query coverage of 98%.

| NCBI data set searched       | Identity match | NCBI accession | Location origin of sequenced species | NCBI species description                                 |
|------------------------------|----------------|----------------|--------------------------------------|----------------------------------------------------------|
| All species                  | 99%            | KU886306.1     | Arctic freshwater                    | <i>Chloromonas</i> sp. KNF0032                           |
| All species                  | 99%            | HQ404890.1     | Antarctica                           | <i>Chloromonas</i> sp. CCCryo273-06 strain CCCryo 273-06 |
| All species                  | 98%            | EF106784.1     | Uni of Nevada                        | <i>Chlamydomonas</i> sp. CCMP681                         |
| <i>Chloromonas nivalis</i>   | 92%            | AF514409.1     | Svalbard snow                        | <i>Chloromonas nivalis</i> strain CCCryo 005-99          |
| <i>Chloromonas nivalis</i>   | 92%            | GU117576.1     | Austria red snow                     | <i>Chloromonas nivalis</i>                               |
| <i>Chloromonas nivalis</i>   | 92%            | AF514406.1     | Svalbard snow                        | <i>Chloromonas nivalis</i> strain CCCryo 047-99          |
| <i>Chlamydomonas nivalis</i> | 92%            | JQ790560.1     | Svalbard red snow                    | <i>Chlamydomonas nivalis</i> strain CCCryo RS_0015-2010  |
| <i>Chlamydomonas nivalis</i> | 92%            | JQ790558.1     | Svalbard red snow                    | <i>Chlamydomonas nivalis</i> strain CCCryo RS_0005-2004  |
| <i>Chlamydomonas nivalis</i> | 92%            | JQ790557.1     | Svalbard red snow                    | <i>Chlamydomonas nivalis</i> strain CCCryo RS_0006-2004  |

**Methods S1** R script. Raw read metabarcoding data R script in vegan. Zip R script files are attached separately.

**References:**

**Benning LG, Phoenix VR, Yee N, Tobin MJ. 2004.** Molecular characterization of cyanobacterial silicification using synchrotron infrared micro-spectroscopy. *Geochimica et Cosmochimica Acta* **68**: 729–741.

**Lutz S, Anesio AM, Field K, Benning LG. 2015.** Integrated ‘Omics’, Targeted metabolite and single-cell analyses of Arctic snow algae functionality and adaptability. *Frontiers in Microbiology* **6**: 1323 doi:10.3389/fmicb.2015.01323

**Mayers JJ, Flynn KJ, Shields RJ. 2013.** Rapid determination of bulk microalgal biochemical composition by Fourier Transform Infrared Spectroscopy. *Bioresource Technology* **148**: 215-220.

**Paliy O, Shankar V. 2016.** Application of multivariate statistical techniques in microbial ecology. *Molecular Ecology* **25**: 1032–1057.
